# Supplementary material
Source: publisher figshare collection journal article supplement (https://sage.figshare.com/ndownloader/files/32691333)
Supplement: Supplementary file 1 [file 32691333]

COREQ (COnsolidated criteria for REporting Qualitative research) Checklist

A checklist of items that should be included in reports of qualitative research. You must report the page number in your manuscript where you consider each of the items listed in this checklist. If you have not included this information, either revise your manuscript accordingly before submitting or note N/A.

| **Topic** | **Item No.** | **Guide Questions/Description** | **Reported on**  **Page No.** |
| --- | --- | --- | --- |
| **Domain 1: Research team**  **and reﬂexivity** | | | |
| *Personal characteristics* | | | |
| Interviewer/facilitator | 1 | Which author/s conducted the interview or focus group? | EM |
| Credentials | 2 | What were the researcher’s credentials? E.g. PhD, MD | PhD, MScH |
| Occupation | 3 | What was their occupation at the time of the study? | Senior Researcher/Associate Professor |
| Gender | 4 | Was the researcher male or female? | Female |
| Experience and training | 5 | What experience or training did the researcher have? | >10 years |
| *Relationship with*  *participants* | | | |
| Relationship established | 6 | Was a relationship established prior to study commencement? | No relationship prior to commencement |
| Participant knowledge of  the interviewer | 7 | What did the participants know about the researcher? e.g. personal  goals, reasons for doing the research |  |
| The reasons for doing the research and aim of the study. |
|  |
| Interviewer characteristics | 8 | What characteristics were reported about the inter viewer/facilitator?  e.g. Bias, assumptions, reasons and interests in the research topic | Resear |
| Health science researcher working within infectious disease with a focus on women living with HIV. |
|  |
| **Domain 2: Study design** | | | |
| *Theoretical framework* | | | |
| Methodological orientation and Theory | 9 | What methodological orientation was stated to underpin the study? e.g. grounded theory, discourse analysis, ethnography, phenomenology,  content analysis |  |
| Narrative enquiry |
|  |
| *Participant selection* | | | |
| Sampling | 10 | How were participants selected? e.g. purposive, convenience,  consecutive, snowball |  |
| Participants were consecutively selected and enrolled during clinical appointments based on the inclusion criteria for the 2BMOM study |
|  |
| Method of approach | 11 | How were participants approached? e.g. face-to-face, telephone, mail,  email |  |
| By healthcare providers during clinical appointments |
|  |
| Sample size | 12 | How many participants were in the study? | 31 |
| Non-participation | 13 | How many people refused to participate or dropped out? Reasons? | Five women were approached and did not want to participate in the qualitative part of the 2BMOM study. No specific reason was given. No one dropped out. |
| *Setting* | | | |
| Setting of data collection | 14 | Where was the data collected? e.g. home, clinic, workplace | In the home of the participant, at the relevant hospital, or online using a video meeting setup, whichever setting the woman preferred. |
| Presence of non-  participants | 15 | Was anyone else present besides the participants and researchers? |  |
| The women´s partner was present in four of the interviews |
|  |
| Description of sample | 16 | What are the important characteristics of the sample? e.g. demographic  data, date |  |
| 24 women lived in Denmark, five women lived Finland, and two lived in. Sweden. 62% originated from an African country, 29% from a Nordic Country and 10% from another country outside of the Nordic Countries. |
|  |
| *Data collection* | | | |
| Interview guide | 17 | Were questions, prompts, guides provided by the authors? Was it pilot  tested? | An interview guide was used in all interviews. This was pilot tested prior to commencement. |
|  |
| Repeat interviews | 18 | Were repeat inter views carried out? If yes, how many? | No |
| Audio/visual recording | 19 | Did the research use audio or visual recording to collect the data? | All interviews were audio recorded |
| Field notes | 20 | Were ﬁeld notes made during and/or after the inter view or focus group? | Fields notes were collected during the interviews. |
| Duration | 21 | What was the duration of the inter views or focus group? | The interviews lasted between 20 and 90 minutes (mean 51 minutes) |
| Data saturation | 22 | Was data saturation discussed? | Data saturation was discussed among the authors (NW and EM) |
| Transcripts returned | 23 | Were transcripts returned to participants for comment and/or | No |

| **Topic** | **Item No.** | **Guide Questions/Description** | **Reported on**  **Page No.** |
| --- | --- | --- | --- |
|  |  | correction? |  |
| **Domain 3: analysis and**  **ﬁndings** | | | |
| *Data analysis* | | | |
| Number of data coders | 24 | How many data coders coded the data? | Three: EM, DS and NW |
| Description of the coding  tree | 25 | Did authors provide a description of the coding tree? |  |
| Yes, in Figure 1 |
| Derivation of themes | 26 | Were themes identiﬁed in advance or derived from the data? | Derived from the data |
| Software | 27 | What software, if applicable, was used to manage the data? | NVivo software, ©QSR International Pty Ltd, was used to support the data management throughout the analysis |
| Participant checking | 28 | Did participants provide feedback on the ﬁndings? | No |
| *Reporting* | | | |
| Quotations presented | 29 | Were participant quotations presented to illustrate the themes/ﬁndings?  Was each quotation identiﬁed? e.g. participant number |  |
| Yes |
|  |
| Data and ﬁndings consistent | 30 | Was there consistency between the data presented and the ﬁndings? | Yes |
| Clarity of major themes | 31 | Were major themes clearly presented in the ﬁndings? | Yes |
| Clarity of minor themes | 32 | Is there a description of diverse cases or discussion of minor themes? | Yes |

Developed from: Tong A, Sainsbury P, Craig J. Consolidated criteria for reporting qualitative research (COREQ): a 32-item checklist for interviews and focus groups. *International Journal for Quality in Health Care*. 2007. Volume 19, Number 6: pp. 349 – 357

**Once you have completed this checklist, please save a copy and upload it as part of your submission. DO NOT include this checklist as part of the main manuscript document. It must be uploaded as a separate file.**
